# Latent developmental and evolutionary shapes embedded within the composite leaves of grape

Daniel H. Chitwood<sup>1,4</sup>, Laura L. Klein<sup>2</sup>, Regan O'Hanlon<sup>2</sup>,  
Steven Chacko<sup>2</sup>, Matthew Greg<sup>2</sup>, Cassandra Kitchen<sup>2</sup>,  
Allison J. Miller<sup>2</sup>, Jason P. Londo<sup>3</sup>

<sup>1</sup>Donald Danforth Plant Science Center, St. Louis, MO 63132 USA

<sup>2</sup>Department of Biology, Saint Louis University, St. Louis, MO 63103 USA

<sup>3</sup>United States Department of Agriculture, Agriculture Research Service, Grape  
Genetics Research Unit, Geneva, NY 14456 USA

Short title: Latent leaf shapes

Key words: Leaf morphology, leaf shape, phenotype, development, grape

<sup>4</sup>To whom correspondence should be addressed

Daniel H. Chitwood  
Donald Danforth Plant Science Center  
975 North Warson Road  
St. Louis, MO 63132  
Phone: (314) 587-1609  
Fax: (314) 587-1709  
e-mail: dchitwood @ danforthcenter.org

The author(s) responsible for distribution of materials integral to the findings presented in this article in accordance with the policy described in the Instructions for Authors ([www.plantcell.org](http://www.plantcell.org)) is: Daniel H. Chitwood ([dchitwood@danforthcenter.org](mailto:dchitwood@danforthcenter.org)). Contact information for the author(s) responsible for distribution of material(s) should be provided. (See Materials Distribution Policy for journal expectations in this regard.)

## Abstract

Across plants, leaves exhibit profound diversity in shape. As a single leaf expands, its shape is in constant flux. Additionally, plants may also produce leaves with different shapes at successive nodes. Because leaf shape can vary in many different ways, theoretically the effects of distinct processes are separable, even within the shape of a single leaf. Here, we measure the shapes of >3,200 leaves representing >270 vines from wild relatives of domesticated grape. We isolate latent shapes embedded within the overall shape of leaves that can predict developmental stages independent from species identity and vice versa. Shapes predictive of development are then used to stage leaves from 1,200 varieties of domesticated grape, revealing that changes in timing underlie leaf shape diversity. Our results indicate distinct latent shapes combine to produce a composite morphology in leaves, and that developmental and evolutionary contributions to shape vary independently from each other.

## Introduction

Leaf morphology represents a beautiful and tangible example of the infinite phenotypic possibilities in nature. Underlying leaf shape diversity is a quantitative genetic (Langlade et al., 2005; Kimura et al., 2008; Tian et al., 2011; Chitwood et al., 2013) and developmental genetic (Bharathan et al., 2002; Kim et al., 2003; Blein et al., 2008) framework. It is possible that aspects of leaf shape are functionally neutral and reflect developmental constraint (Chitwood et al., 2012a; 2012b), but numerous hypotheses about the function of different leaf shapes exist, including how shape impacts thermal regulation, hydraulic constraints, light interception, biomechanics, and herbivory (Parkhurst and Loucks, 1972; Nicotra et al., 2011; Ogburn and Edwards, 2013). Fossil leaf size and dissection are correlated with the paleoclimate (Bailey and Sinnott, 1915; Wolfe, 1971; Greenwood, 1992; Wilf et al., 1998), a relationship that persists in extant taxa (Peppe et al., 2011), and with implications for the chemical, structural, and physiological economics of leaves (Wright et al., 2004). Correspondingly, functional traits related to leaf shape display phylogenetic signal in some clades (Cornwell et al., 2014). Understanding the spatial and temporal patterns of leaf shape variation is a central theme in studies focusing on plant biodiversity, impacts of global climate change, and agricultural efficiency.

Leaf shape varies not only across evolutionary timescales and within a functional ecological context, but during development as well. Two distinct temporal processes regulate leaf shape during development. 1) The shape of individual leaves is in constant flux as local regions within the leaf expand at different rates. This phenomenon, allometric expansion, was explored as early as Hales' *Vegetable Staticks* (1727). Using a grid of pins, regularly spaced puncture points in fig leaves were tracked to determine if their relative spacing changed during development. The same experiment can be microscopically studied using fluorescent particles today (Remmler and Rolland-Lagan, 2012; Rolland-Lagan et al., 2014). 2) The leaves that emerge at successive nodes differ in their shape, as the shoot apical meristem from which they derive transitions from a juvenile to adult stage of development. This process, heteroblasty, can affect other features of leaves besides shape, such as

cuticle and trichome patterning (Goebel, 1900; Ashby, 1948; Poethig, 1990; Kerstetter and Poethig, 1998; Poethig, 2010).

The developmental stage of a leaf and the position of the node from which it arises (leaf number) are distinct temporal factors affecting leaf shape. Genetic changes in the timing of either process (e.g., protracted development of individual leaves or precociously adult leaf morphology in early nodes) between species can lead to evolutionary differences in leaf shape, a process known as heterochrony. The timing of these processes can be changed non-genetically as well, through responses to environmental changes during the lifetime of a plant, known as plasticity (Allsopp, 1954; Diggle, 2002). Distinguishing effects of developmental stage from leaf number provides mechanistic insights into how genetic changes during evolution or plastic changes in response to the environment are achieved (Jones, 1993; 1995). For example, recent work has linked molecular pathways regulating the timing of shape changes throughout the shoot (miR156/172 and their targets) with leaf morphology (CUC-induced serrations) through a mediator (TCPs) (Rubio-Somoza et al., 2014).

If distinct molecular pathways affect different traits within the infinite features defining the architecture of a leaf, then the outline and venation topology of leaves should theoretically be decomposable into latent shapes (Chitwood and Topp, 2015). For example, shape differences defining species, regardless of developmental context, may vary distinctly from those features that define developmental context, regardless of species. These shapes are latent because they globally affect leaf shape in different ways, and each of the features comprising the latent shapes alone do not necessarily discriminate the effects of genetics or development. From this perspective, the shape of a given leaf—from any species, from any time point during development or any position in the plant—would result from the confluence of latent shapes regulated by these processes. The single organ that we call a leaf would actually be a composite of latent features that vary by genetic versus developmental effects, independently from each other.

Grapevine (*Vitis* spp.) leaves exhibit a breathtaking range of variation in leaf shape, making this genus ideally suited to explore evolutionary and developmental influences on form (**Fig. 1**). Taxonomists have used variation in leaf lobing and leaf margins to delimit the nearly 60 species in the genus (Moore, 1991; Ren and Wen, 2007). Leaf shape is also important in assessing intraspecific variation in the European grapevine (*Vitis vinifera* ssp. *vinifera*), which is grown around the world for wine-making and table grapes. Unique among crops, variation in grape leaf shape (together with other vine features) was once, and is still today, used by viticulturists to quantitatively classify grape varieties, a field known as ampelography (αμπελος, "vine" and γραφος, 'writing') (Galet, 1952). Grape leaves have several homologous points amenable to landmark-based analyses (Galet, 1979; Chitwood et al., 2014), increasing the biological interpretation of morphometric data compared to species with stochastic venation topologies or limited homology (such as *Arabidopsis*, tomato, *Antirrhinum*, etc.). Like Hales' grid of pins (1727), naturally homologous points in grape leaves allow developmental stage and leaf number effects to be quantitatively tracked, potentially revealing separable latent processes contributing to the composite morphology known as a leaf.

## Results

### *Developmental stage versus leaf number*

To determine the effects of developmental stage, leaf number, and evolutionary lineage (taxonomic identity) on leaf shape we scanned >3,200 leaves from wild relatives of domesticated grape held by the USDA germplasm repository in Geneva, NY. Like many living collections of perennial crops, the Geneva repository houses multiple genotypes of different *Vitis* species in common conditions. This extensive collection includes wild-collected accessions of at least 19 North American and Asian *Vitis* species as well as assorted *V. vinifera* hybrids. From the Geneva repository we sampled >270 vines representing 12 *Vitis* species, 4 *V. vinifera* hybrids, and 3 species from the related genus *Ampelopsis*. Each sampled vine

represents a unique genetic accession. The number of vines sampled for each species varied widely (**S1 Figure**), but in this study we focus on 10 species for which  $\geq 5$  accessions were sampled: *Vitis riparia* (71 vines), *V. labrusca* (40 vines), *V. cinerea* (37 vines), *V. rupestris* (28 vines), *V. acerifolia* (16 vines), *V. amurensis* (16 vines), *V. vulpina* (13 vines), *V. aestivalis* (8 vines), *V. coignetiae* (5 vines), and *Vitis palmata* (5 vines). All *Vitis* leaves possess a midvein, distal and proximal veins, a petiolar vein, as well as proximal and distal lobes and sinuses, and wide variation in the width of the petiolar sinus (**Fig. 1A**). We leverage these homologous points and others to measure 17 landmarks in all leaves (**S1 Dataset**). Later, we compare the leaves from the wild relatives of grape described above to previously published data on 1,200 varieties of domesticated grape (Chitwood et al., 2014), which we describe in subsequent sections.

For each vine accession, a representative shoot was selected and the shoot position of each leaf recorded (**Fig. 1B-C**). Developmental stage is measured by counting from the youngest, first measureable leaf at the shoot tip. The time between successively initiated leaves is a plastochron, and the youngest initiated leaf primordium at the shoot apical meristem is denoted P1 (plastochron 1) to indicate this. But because we begin not with P1 (which is microns in size) but with the first measureable leaf ( $\sim 1$  cm in size), we use S1 (for “stage”) to denote the youngest measured leaf at the shoot tip counting numerically upwards (S2 . . . Sn) towards the shoot base. Contrastingly, leaf number begins with the first initiated leaf (L1) found at the shoot base and counts numerically upward (L2 . . . Ln) towards the shoot tip (**Fig. 1C**). These two metrics are used to differentiate the effects of developmental stage (Sn) from leaf number (Ln) (**Fig. 1C**).

The effects of developmental stage are expected to be strongest in young leaves at the shoot tip (with low S numbers and high L numbers; **Fig. 1C**), as their shape is in flux during their expansion. Older leaves at the shoot base (with low L numbers and high S numbers) are more influenced by leaf number, because they reflect changes in mature leaf shape at successive nodes. The vast majority of the vines we sampled

possess leaves corresponding to S1-S10 and L1-L10 (86% represent developmental stages up to P10 and 88% represent leaf numbers up to L10, **S1 Figure**) and we restrict our analyses to these positions (**Fig. 1C**).

### *Morphospace of leaves in the genus Vitis*

Landmarks are aligned (accounting for translation, rotation, and scaling) using a Generalized Procrustes Analysis (GPA). A Principal Component Analysis (PCA) is then performed to visualize the major sources of shape variance among leaves. The first four PCs explain 73.2% of shape variance among leaves from *Vitis* species, developmental stages, and leaf numbers (**Fig. 2**). More than half of the shape variance, represented by PC1 and PC2, is influenced by lobing and the width of the petiolar sinus. Low PC1 and high PC2 values readily distinguish highly dissected *Vitis* species and some members of the related genus *Ampelopsis* (**Fig. 2B**).

In order to examine the variability of developmental stage and leaf number in morphospace, we visualize each PC as a locally weighted scatterplot smoothing (LOWESS) curve plotted against stage and leaf number. Developmental stage and leaf number vary less by PC1 than by PC2 and PC3 (i.e., PC1 values are relatively developmentally-invariant compared to PC2 and PC3 values) (**Fig. 2C-D**). PC2 and PC3 values are largely indistinguishable between species across developmental stages (**Fig. 2C**) and leaf number (**Fig. 2D**), suggesting strongly conserved morphological features in developing leaves across species for these shape attributes, particularly for early developmental stages (**Fig. 2C**). Because PCs are orthogonal (i.e., uncorrelated), the fact that species, developmental stage, and leaf number correlate differentially with PCs is suggestive that each might be represented by independent shape attributes present within leaves. Re-visualizing the morphospace by developmental stage (**Fig. 2E**) and leaf number (**Fig. 2F**) demonstrates these factors mostly vary by PC2 and PC3, whereas species shape differences traverse along morphospace paths defined by PC1, PC2, and PC3 (**Fig. 2B**).

To help qualitatively understand the different ways grape leaves differ among species and developmental contexts, we compared average shapes (**Fig. 3**). Related members of Moore's Series Ripariae (*V. acerifolia*, *V. riparia*, and *V. rupestris*) (Moore, 1991; Miller et al., 2013) are defined by a shallow petiolar sinus, especially *V. rupestris* (**Fig. 3A**). Outside of the Ripariae, *V. vulpina* and *V. cinerea* also exhibit shallow petiolar sinuses but to a lesser extent, while the petiolar sinus of the remaining species (*V. aestivalis*, *V. labrusca*, *V. palmata*, *V. coignetiae*, *V. amurensis*) is more acute. *Vitis palmata* exhibits especially deep distal lobing relative to other species. Each species' leaves also vary by developmental stage (**Fig. 3B**) and leaf number (**Fig. 3C**), usually by the length of the leaf tip and the shallowness of the petiolar sinus. In the next section, we determine the extent that shape attributes varying by species, developmental stage, and leaf number are separable from each other.

#### *Latent shapes independently predict species, developmental stage, and leaf number*

We used a Linear Discriminant Analysis (LDA) to maximize the separation of leaf attributes (whether species, developmental stage, or leaf number) from each other using all measured shape information. The resulting linear discriminants can be used to predict the apparent class of a leaf and are useful for comparing actual versus apparent leaf identities as confusion matrices (**Fig. 4**).

Linear discriminants separating species, without regard to developmental stage or leaf number, can be used to predict species identity (**Fig. 4A-C**). For most taxa, the largest proportion of predicted leaves corresponds to the taxonomic identity assigned to that species (**Fig. 4B**, the diagonal indicates the proportion of correctly assigned leaves). Incorrectly assigned leaves are most often confused for other species that are phylogenetically related to the assigned species. For example, a majority of *V. acerifolia* leaves are confused for its close relative *V. riparia*; similarly, the largest group of *V. aestivalis* leaves are confused for its relative *V. labrusca*. In



contrast, the Asian *V. coignetiae* leaves are confused for more distant relatives native to North America, including *V. labrusca* and *V. cinerea* and sometimes even *V. riparia*, perhaps indicating convergent evolution, germplasm misidentification, or segregating leaf shape differences among these accessions. Interestingly, *Vitis xandersonii*, described as a hybrid of *V. coignetiae* and either *V. vulpina* or *V. riparia*, is strongly mistaken for *V. riparia*, providing circumstantial evidence of parentage. As has been suggested by ampelographers and taxonomists (Moore, 1991; Galet, 1952), our results demonstrate that leaf shape is often sufficient to identify species, even in the absence of developmental information. Instances where leaves of one species are assigned to another offer a valuable opportunity to develop hypotheses about phylogenetic history and convergent evolution that can be tested with additional evolutionary and ecological analyses.

Reciprocally, we wondered whether developmental stage and leaf number, regardless of species identity, might be similarly informative about developmental context. Indeed, linear discriminants trained on developmental stage or leaf number can predict the developmental context of a leaf for either measure (**Fig. 4D-4I**). Developmental stage can be predicted with a Spearman's correlation coefficient of  $\rho = 0.70$  (**Fig. 4D**), and leaf number with  $\rho = 0.61$  (**Fig. 4G**). Prediction of both developmental stage and leaf number is more accurate at the beginning of their respective series, where the effects of each are anticipated to be the strongest (**Fig. 1C**). Based on these observations we conclude that developmental context, measured by either developmental stage or leaf number, can be predicted independently of genotypic information. These results suggest that the effects of development on leaf shape are conserved across genotypes and species, and have implications for isolating distinct molecular pathways that affect leaf shape over evolutionary versus developmental time scales.

The ability to predict developmental context separate from species identity provides a method to quantify differences between species attributable to changes in developmental timing, also known as heterochrony. For each leaf, we calculate

relative developmental stage and relative leaf number as the apparent value minus the actual value (e.g., an S5 leaf predicted to be S7 would have a relative stage value of +S2, and an L4 leaf predicted to be L2 would have a relative value of -2L). Relative values indicate, for a given leaf, how many nodes ahead or behind (developmentally speaking) that leaf appears to be. Averaging the relative developmental stage and leaf number values for each vine, we can detect species that are precociously ahead or lagging behind from expected developmental stage (**Fig. 4E**) and leaf number values (**Fig. 4H**). For example, the mean relative developmental stage of *V. rupestris* vines is about +1S ahead of their actual developmental stage (**Fig. 4E**) and about -2L behind actual leaf number (**Fig. 4H**). This accelerated development (Sn) and protracted display of juvenile leaf types typically found at the base of the shoot (Ln) contributes towards the unique shape of *V. rupestris* leaves compared to other *Vitis* spp. (**Fig. 3**). *Vitis rupestris* leaves (**Fig. 3A**), older leaves (high Sn values, **Fig. 3B**), and juvenile leaves (low Ln values, **Fig. 3C**) all share a characteristic wideness conferred by a diminished leaf tip.

Within *Vitis*, the identity of inflorescences, which appear opposite leaves, transform from clusters at the shoot base to tendrils at the shoot tip (Srinivasan and Mullins, 1981; Gerrath, 1988; Gerrath, 1993; Boss and Thomas, 2002) (**Fig. 1C**). Both changes in leaf shape at successive nodes and the transformation of inflorescence identity indicate temporal changes in the development of the shoot apical meristem, known as heteroblasty. The cluster-to-tendril transformation serves as a discrete, binary indication of the heteroblastic transition. If heteroblasty regulates both the latent shapes predicting leaf number and the cluster-to-tendril transition, we would assume they would be correlated. Indeed, there is a significant negative correlation between relative leaf number and the first node a tendril is observed: that is, in vines with precocious, adult leaves (i.e., higher relative leaf numbers, typical of leaves found more towards the shoot tip), tendrils appear at earlier nodes closer to the base of the shoot, linking two different measures of premature heteroblastic change (**Fig. 4I**). Moreover, this correlation is not observed for relative developmental stage (**Fig. 4F**). Taken together, these results indicate that latent

shapes predictive of developmental stage and leaf number are functionally distinct, reflecting the developmental progression of leaves ( $S_n$ ) and their heteroblastic transitions across successive nodes of the shoot ( $L_n$ ) separately.

Average leaf shapes indicate that developmental stage and leaf number vary by the prominence of the leaf tip and the shallowness of the petiolar sinus (**Fig. 4J-L**). The shape changes for these two factors are inversely related, but obviously distinguishable from each other, given their differential correlation with tendril position (**Fig. 4F, 4I**). Upon closer inspection, the distal lobe tips and the branch point of the petiolar vein distinguish shape changes attributable to developmental stage and leaf number (**Fig. 4L**), isolating the shape attributes unique to these functionally distinct processes.

#### *Morphological differences between domesticated grape and wild relatives*

Previously, we measured >9,500 leaves from *V. vinifera* subsp. *vinifera* (domesticated grape) and its wild progenitor *V. vinifera* subsp. *sylvestris*. These leaves, collected from the USDA germplasm repository in Winters, CA, represent over 2,300 vines and 1,200 varieties (Chitwood et al., 2014). These leaves were sampled to measure purely genetic effects and minimize the influence of development by collecting four successive leaves from the midpoint of the shoot. That species identity can be predicted independently from developmental context in wild *Vitis* spp. (**Fig. 4A-C**) with disparate leaf shapes lends credence to the assumption that developmental context can be ignored, which is almost always invoked when mapping traits for quantitative genetic purposes or taxonomically defining species.

We wanted to compare leaves from domesticated grape and its wild progenitor to the other *Vitis* species described above. To do so, we restricted our analysis *in silico* to leaves at the same shoot positions we had originally collected in domesticated grape (the four leaves closest to the midpoint of the shoot). In the combined

morphospace, PC1 and PC2 describe nearly 60% of shape variance (**Fig. 5**). Similar to the wild *Vitis* species-only morphospace (**Fig. 2A**), lobing and the petiolar sinus define the first PCs. Petiolar veins in domesticated grape varieties can be so angled they cross each other, and because of this the closure of the petiolar sinus represented by high PC1 values is particularly strong (**Fig. 5A**). Leaf dissection defined by high PC1 and high PC2 values clearly delineates less lobed wild *Vitis* species from more acutely lobed domesticated grape varieties (**Fig. 5B**). Highly dissected species such as *Ampelopsis acontifolia*, *V. piasezkii*, *V. thunbergii*, and *V. vinifera* var. Ciotat form a distinct morphological grouping.

While there are clear patterns in leaf shape related to development and species identity, correspondence between the morphospace of wild and domesticated *Vitis* species and evolutionary relationships among *Vitis* species is complex. Some, but not all, well-known phylogenetic relationships are reflected in leaf morphology. (**Fig. 5C**) (Miller et al., 2013; Zecca et al., 2012). Notably, clustering averaged shapes from different genotypes reveals that *V. vinifera* subsp. *vinifera* is morphologically sister to *V. vinifera* subsp. *sylvestris*, the wild progenitor of the domesticated grape (**Fig. 5C**, Group II) (Zecca et al., 2012; Myles et al., 2011). Also within Group II are two Asian species, *V. amurensis* and *V. coignetiae*, which together with *V. vinifera* subsp. *vinifera* and *V. vinifera* subsp. *sylvestris* represent members of a Eurasian clade. Within Group III are found members of Series Ripariae (*V. acerifolia*, *V. riparia*, *V. rupestris*). Leaf shapes of *Vitis* hybrids cluster based on parental lineages, with *V. xchampinii* and *V. xdoaniana* clustering in Group III presumably because of their *V. rupestris* and *V. acerifolia* heritages (respectively) and *V. xandersonii* and *V. xnovae-angliae* clustering closer with their *V. coignetiae* and *V. labrusca* parents (respectively). These observations suggest similarities in leaf shape may reflect recent evolutionary events, domestication, or contemporary interspecific gene flow.

At broader levels of phylogenetic scale, however, patterns of leaf shape similarity do not appear to correspond with known evolutionary relationships. For example, together with *V. vinifera* subsp. *vinifera*, *V. vinifera* subsp. *sylvestris*, and two Asian

species found Group II (discussed above) are other North American species (*V. labrusca*, *V. palmata*), several hybrids, and *Ampelopsis brevipedunculata*, taxa that are not known to be closely related to one another. A previously identified clade based on molecular data (*V. aestivalis*, *V. cinerea*, *V. labrusca*, and *V. vulpina*) here is divided between Groups II and III. Although *Vitis* is well known to be a monophyletic genus (Wen et al., 2007; 2013), based on leaf shape three species of *Ampelopsis* cluster in three different groups, together with *Vitis* species. These data suggest that while leaf shape may bear signatures of recent evolutionary events, leaf shape does not appear to track with phylogeny at larger scales; distantly related species, even from distinct genera, resemble each other in leaf shape through evolutionary convergence.

### *Changes in developmental timing underlie morphological diversity in domesticated grape leaves*

Even though leaves from equivalent positions in the shoot clearly separate species and varieties by genetic effects (**Fig. 5**), such effects may still be developmental in nature, an example of heterochrony. If changes in the relative timing of developmental stage (Sn) or leaf number (Ln) have occurred, they would contribute to morphological differences between species, as described above for wild *Vitis* spp. (**Fig. 4E, 4H**). The conserved latent shapes defining developmental stage and leaf number in morphologically disparate *Vitis* species can be used predictively to detect such changes in timing.

We used wild species leaves, from S1-S10 and L1-L10 (where developmental stage and leaf number effects are the strongest, respectively) as a training set, to predict the stage (Sn) and leaf number (Ln) values of domesticated grape leaves (**Fig. 6**). When comparing leaf averages across predicted developmental stages (**Fig. 6A**) and leaf numbers (**Fig. 6B**), it is apparent that variation in petiolar sinus depth is the major predictor of developmental timing in domesticated grape leaves (**Fig. 6C**). Variation in the petiolar sinus is a recurrent theme in morphology associated with

both developmental stage and leaf number (**Figs. 3B-C; 4J-L**). Indeed, the predicted developmental stages and leaf numbers of domesticated grape leaves are significantly correlated with PC1 and PC2 (**Fig. 6D-E, 6G-H; S2 Dataset**), which together explain near 60% of total shape variance for measured *Vitis* genotypes (**Fig. 5A**). From this, we conclude that latent shape attributes modulating developmental stage and leaf number explain large amounts of shape variance in domesticated grape, indicating changes in developmental timing (heterochrony) underlie the morphological evolution of grape varieties.

#### *The relationship of leaf shape and timing to other traits in domesticated grape*

Previously, numerous other traits, from timing of bud burst and flowering to berry ripening and titratable acids and sugar content, had been measured on the domesticated grapevines described above (Chitwood et al., 2014). We were curious about the correlational context of overall leaf shape (represented by PCs) and developmental timing (predicted developmental stage and leaf number) to these other traits. One trait, “PETSINMALF 2009”, is a qualitative, 0-8 rating of petiolar sinus depth, and is tightly correlated to PC1, PC2, and predicted developmental stage and leaf number, confirming that our quantitative measures reflect intuitive perceptions of leaf shape. (**Fig. 6F, 6I-J; S2 Dataset**). Leaf morphology traits, including predicted developmental timing, are largely separate from bud burst and bloom dates (“BUDBURST DATE”, “BLOOMDATE”, “LEAFDATE”), indicating that these timing features are separate from the overall transition to reproductive development in grapevine (**Fig. 6J**). Further, leaf shape is distinct from overall size of leaves (“LEAF SIZE”), demonstrating that grape leaf shape is not merely a developmental constraint correlated with overall size (i.e., allometry) (**Fig. 6J**). One group of traits significantly correlated and clustering with leaf shape is hirsuteness, both in leaves and the shoot (“LEAF HAIR”, “SHOOT HAIR”), which we had observed previously in domesticated grape (Chitwood et al., 2014). Leaf hirsuteness varies by both developmental stage, as trichomes become less dense as the leaf expands, and also by leaf number. It is interesting to think about how thermoregulation, disease

resistance, or other trichome mediated functionality may vary as a developmental constraint as developmental timing changed over the evolution and domestication of grapevines.

## Discussion

Many descriptions of complex traits, from faces to voices, and even the evolution of cultural products, such as violins (Zhand et al., 1997; Kuhn et al., 2000; Claes et al., 2014; Chitwood, 2014), potentially stand to benefit from isolating features uniquely regulated by distinct pathways. Like a face, leaf shape is modulated in complicated ways by genetics, development, and the environment. The latent shapes we describe here, describing developmental stage and leaf number, embedded within the overall shape of a leaf, and conserved across the genus *Vitis*, fit the definition of a “cryptotype”. Recently, we had suggested the term “cryptotype,” borrowed from linguistics (which uses both “phenotype” and “cryptotype” parallel to the biological definitions) (Whorf, 1945), to describe latent, combinatorial features (e.g., 17 homologous landmarks) within a shared multivariate space that vary independently from each other (Chitwood and Topp, 2015). Cryptotypes are not unreal or even abstract; they are simply a set of features, that when combined, best discriminate one biological process (e.g., evolutionary history) from others (e.g., developmental stage). The shapes that arise through this combination of features are latent only because they are not immediately recognizable when each of their component landmarks is considered alone; the effects of genetics and development affect the entirety of the leaf. The multivariate cryptotypes of genotype, developmental stage, and leaf number stand in contrast to traditional univariate phenotypes, such as height, biomass, or leaf length, width, or area.

Defining such combinative, latent shapes is critical to understand the mechanisms by which morphological diversity manifests in plants. The unequal expansion of leaves (allometry) and the different types of leaves displayed at nodes (resulting from heteroblasty) have been studied for centuries (Hales, 1727; Goethe, 1817;

Goebel, 1900; Goethe (trans.), 1952), but the inability to distinguish the effects at a morphological level, within the shared morphology of single leaves where these processes act, has led to confusion. Early hypotheses that shade prolongs juvenility through a heteroblastic mechanism were later refuted by carefully studying the morphology of leaf primordia (Jones, 1995). Similar, the degree that changes in the development of leaves or the heteroblastic series influences evolutionary changes—and plasticity—remains an open question.

Recent studies have uncovered a transcriptomic basis underlying heteroblasty (Efroni et al., 2008), and similarly dramatic transitions to reproductive fates (Park et al., 2012), within meristems. An understanding of molecular clocks, regulating phase change through small RNAs (Chuck et al., 2007; Wu et al., 2009), and their signals, such as sugar (Yang et al., 2013; Yu et al., 2013), has come into focus. Of the many gene regulatory networks regulating leaf shape, specific pathways have been identified mediating heteroblastic shape changes (Rubio-Somoza et al., 2014). Similar molecular descriptions of leaf development exist (Ichihashi et al., 2014) and the crosstalk between these two processes is large. Strangely, even though molecular correlates of leaf development and heteroblasty have been uncovered, a phenotypic basis for the morphological effects of temporal patterning remains obscure, except in a qualitative sense.

Decomposing complex morphologies into latent shapes regulated by distinct pathways is required to precisely describe the mechanisms that, together, produce the composite shape of a single leaf. By isolating latent shapes that are regulated by evolution and development, we can focus on those attributes of the leaf most relevant for producing the diversity of leaf shapes observed in nature, and consider the functional contributions of leaf morphology to assessments of biodiversity, plant responses to global climate change, and the genetic improvement of crop species.

## **Materials and Methods**



**Germplasm, sample collection, and scanning.** Over 270 vines in the USDA *Vitis* germplasm collection in Geneva, NY were sampled in June, 2013. Using an automatic label maker, vine identification number and the identity of organs (or lack thereof) at each node, beginning with the first sampled leaf at the tip, was recorded in the field. Leaves, beginning with the first leaf at the tip that could be flattened and scanned (~1 cm in length), were collected in order, shoot tip to base, as a stack and placed into a Ziploc bag to which the label was affixed. A single shoot was collected per vine, and bags were placed into a cooler until scanning. A description of the number of vines (genotypes) collected for each species and hybrid, as well as the number of leaves representing different developmental stages (Sn) and leaf numbers (Ln) can be found in supplemental information (**S1 Figure**).

Leaves were arranged on a scanner (Mustek A3 1200S), in the collected order from the shoot, and next to each leaf was placed a small label indicating nodes (as measured by developmental stage) and organ identity opposite the node ("C", cluster; "T", tendril; "N", no organ). The abaxial side of leaves was imaged. The file name of the image indicates the vine ID, and the appended letter indicates which image in the series the file represents for each vine. The raw scans are publically available at the following link: [http://thedata.harvard.edu/dvn/dv/vitis\\_leaves/](http://thedata.harvard.edu/dvn/dv/vitis_leaves/)

**Landmarking.** For both wild *Vitis* species and reanalyzed *V. vinifera* data, 17 landmarks were placed, in order, for each leaf using the ImageJ (Abramoff et al., 2004) point tool. Landmarks and their order were as follows: 1) petiolar junction, 2) midvein tip, 3) left distal sinus, 4) right distal sinus, 5) left distal lobe tip, 6) right distal lobe tip, 7) left proximal sinus, 8) right proximal sinus, 9) left proximal lobe tip, 10) right proximal lobe tip, 11) left terminus petiolar vein, 12) right terminus petiolar vein, 13) branch point midvein, 14) branch point left distal vein, 15) branch point right distal vein, 16) branch point left proximal vein, 17) branch point right proximal vein. Using ggplot2 (Wickham, 2009) in R (R Core Team, 2014), graphs for landmarks from each image were visually checked for errors. If errors were detected, the landmarking was redone for those particular samples.

**Morphometric analysis and visualization.** Once a quality landmarked dataset was created, a Generalized Procrustes Analysis (GPA) was undertaken using the R package *shapes* (Dryden, 2013). For 17 landmarks in two dimensions (x,y coordinates) for 3,292 leaves of wild *Vitis* species and 9,548 *V. vinifera* leaves, GPA was performed using the *procGPA* function, *reflect=TRUE*. Separate Procrustes analyses were performed for 1) all wild *Vitis* species leaves at all shoot positions and 2) *V. vinifera* subsp. *vinifera* and subsp. *sylvestris* leaves and wild *Vitis* species leaves selected for the corresponding shoot position as the domesticated grape dataset. Eigenleaves were visualized using the *shapepca* function and PC scores, percent variance explained by each PC, and Procrustes-adjusted coordinates were obtained from *procGPA* object values. To test for correlation between PCs and developmental stage or leaf number, Spearman's rho was calculated, whereas for variability of PC values across species a Kruskal-Wallis test was used.

Linear Discriminant Analysis (LDA) on Procrustes-adjusted coordinates was performed using the *lda* function from the *MASS* package (Venables and Ripley, 2002). Species, developmental stage, and leaf number were all analyzed independent of each other. The *predict* function (*stats* package) and *table* function (*base* package) were used (dependent on *MASS*) to reallocate leaves (whether by species, developmental stage, or leaf number) using the linear discriminants. For the case of predicting *V. vinifera* subsp. *vinifera* developmental stage and leaf number, the wild *Vitis* species data was used as a training set to predict values for domesticated grape leaves. For the wild *Vitis* species data, for each leaf there is actual versus apparent species, developmental stage, and leaf number identities. Relative developmental stage and relative leaf number are calculated as apparent value – actual value. Mean relative developmental stage and relative leaf number values for each vine were used to determine significant deviation of species relative values from zero using a one sample, two tailed t-test. Correlation between relative values and first tendril node was analyzed using Spearman's rho.

As previously described (Chitwood et al., 2014), Germplasm Resources Information Network (GRIN) trait values, averaged on a per accession basis, for *V. vinifera* vines were correlated with each other and morphometric and predicted temporal data using the rcorr function from Hmisc (Harell, 2013) using Spearman's rho and false-discovery rate controlled using the Benjami-Hochberg procedure (Benjamini and Hochberg, 1995). Hierarchical clustering for *V. vinifera* subsp. *vinifera* traits, and for averaged Procrustes-adjusted coordinates for species throughout the genus *Vitis*, was carried out using the hclust function on a distance matrix calculated from correlation performed on complete, pairwise observations and visualized using the as.phylo function from the package ape (Paradis et al., 2004).

Visualization was performed in ggplot2 (Wickham, 2009) using geom\_bar, geom\_boxplot, geom\_point, geom\_segment, geom\_tile, and stat\_smooth functions, among others, and color schemes derived from colorbrewer2.org.

## Acknowledgements

This work was funded by research stipends awarded to DHC, LLK, and JPL through the Grape Research Coordination Network, DBI0741876.

## Author Contributions

DHC, LLK, AJM, JPL designed the research; DHC contributed new analytic/computational/etc. tools; DHC, LLK, RO, SC, MG, CK analyzed data; DHC, LLK, AJM, JPL wrote the paper.

## References

- Abramoff MD Magalhaes PJ, Ram SJ (2004) Image processing with ImageJ. *Biophotonics International* 11(7):36-43.
- Allsopp A (1954) Juvenile stages of plants and the nutritional status of the shoot apex. *Nature* 173:1032-1035.

593 Ashby E (1948) Studies in the morphogenesis of leaves. I. An essay on leaf shape.  
594 *New Phytol* 47:152-176.  
595  
596 Bailey IW, Sinnott EW (1915) A botanical index of Cretaceous and Tertiary climates.  
597 *Science* 41:831-834.  
598  
599 Benjamini Y, Hochberg Y (1995) Controlling the false discovery rate: a practical and  
600 powerful approach to multiple testing. *Journal of the Royal Statistical Society, B*  
601 57(1):289-300.  
602  
603 Bharathan G, Goliber TE, Moore C, Kessler S, Pham T, Sinha NR (2002) Homologies  
604 in leaf form inferred from KNOX gene expression during development. *Science*  
605 296:1858-60.  
606  
607 Blein T, Pulido A, Vialette-Guiraud A, Nikovics K, Morin H, Hay A, Johansen IE,  
608 Tsiantis M, Laufs P (2008) A conserved molecular framework for compound leaf  
609 development. *Science* 322:1835-9.  
610  
611 Boss PK, Thomas MR (2002) Association of dwarfism and floral induction with a  
612 grape 'green revolution' mutation. *Nature* 416:847-850.  
613  
614 Chitwood DH, Headland LR, Ranjan A, Martinez CC, Braybrook SA, Koenig DP,  
615 Kuhlemeier C, Smith RS, Sinha NR (2012a) Leaf asymmetry as a developmental  
616 constraint imposed by auxin-dependent phyllotactic patterning. *Plant Cell* 24:2318-  
617 27.  
618  
619 Chitwood DH, Naylor DT, Thammaphichai P, Weeger AC, Headland LR, Sinha NR  
620 (2012b) Conflict between intrinsic leaf asymmetry and phyllotaxis in the resupinate  
621 leaves of *Alstroemeria psittacina*. *Front Plant Sci* 3:182.  
622  
623 Chitwood DH, Kumar R, Headland LR, Ranjan A, Covington MF, Ichihashi Y, Fulop D,  
624 Jimenez-Gomez JM, Peng J, Maloof JN, Sinha NR (2013) A quantitative genetic basis  
625 for leaf morphology in a set of precisely defined tomato introgression lines. *Plant*  
626 *Cell* 25:2465-81.  
627  
628 Chitwood DH, Ranjan A, Martinez CC, Headland LR, Thiem T, Kumar R, Covington  
629 MF, Hatcher T, Naylor DT, Zimmerman S, Downs N, Raymundo N, Buckler ES, Maloof  
630 JN, Aradhya M, Prins B, Li L, Myles S, Sinha NR (2014) A modern ampelography: a  
631 genetic basis for leaf shape and venation patterning in grape. *Plant Physiol*  
632 164(1):259-72.  
633  
634 Chitwood DH (2014) Imitation, genetic lineages, and time influenced the  
635 morphological evolution of the violin. *PLOS ONE* 9(10):e109229.  
636  
637 Chitwood DH, Topp CN (2015) Revealing plant cryptotypes: defining meaningful  
638 phenotypes among infinite traits. *Curr Opin Plant Biol* 24C:54-60.

639  
640 Chuck G, Cigan AM, Saeteun K, Hake S (2007) The heteroblastic maize mutant  
641 *Corngrass1* results from overexpression of a tandem microRNA. *Nat Genet*  
642 39(4):544-549.  
643  
644 Claes P, Liberon DK, Daniels K, Rosana KM, Quillen EE, Pearson LN, McEvoy B,  
645 Bauchet M, Zaidi AA, Yao W et al. (2014) Modeling 3D facial shape from DNA. *PLOS*  
646 *Genet* 10(3):e1004224  
647  
648 Cornwell WK et al. (2014) Functional distinctiveness of major plant lineages. *J of*  
649 *Ecology* 102:345-356.  
650  
651 Diggle PK (2002) A developmental morphologist's perspective on plasticity.  
652 *Evolutionary Ecology* 16:267-283.  
653  
654 Dryden IL (2013) shapes: Statistical shape analysis. R package version 1.1-9,  
655 <http://CRAN.R-project.org/package=shapes>  
656  
657 Efroni I, Blum E, Goldshmidt A, Eshed Y (2008) A protracted and dynamic  
658 maturation schedule underlies Arabidopsis leaf development. *Plant Cell* 20(9):2293-  
659 2306.  
660  
661 Galet P (1952) Précis d'Ampélographie Pratique. (Montpellier, France: Impr. P.  
662 Déhan).  
663  
664 Galet P (1979) A Practical Ampelography: Grapevine Identification. Translated by L  
665 Morton. (Ithaca, NY: Cornell University Press)  
666  
667 Gerrath JM (1988) Morphological and anatomical development in the Vitaceae. I.  
668 Vegetative development in *Vitis riparia*. *Can J Bot* 66:209-224.  
669  
670 Gerrath JM (1993) Developmental morphology and anatomy of grape flowers. *Hortic*  
671 *Rev* 13:315-337.  
672  
673 Goebel K (1900) *Organography of Plants. I. General Organography*. (New York:  
674 Hafner Publishing Co.).  
675  
676 Goethe JW (1817) Italienische Reise. Goethe's Werk. (Stuttgart, Germany:  
677 Dreizehnter Band).  
678  
679 Goethe JW (1952). Botanical Writings. Trans. B Mueller, introduction C.J. Engard.  
680 (Honolulu, HI: University of Hawaii Press).  
681  
682 Greenwood DR (1992) Taphonomic constraints on foliar physiognomic  
683 interpretations of late Cretaceous and Tertiary palaeoclimates. *Rev Palaeobot*  
684 *Palynol* 71:149-190.

685  
686 Hales S (1727) *Vegetable Staticks or, an Account of Some Statistical Experiments on*  
687 *the Sap in Vegetables*. (London: W. and J. Innys.).  
688  
689 Harell FE (2013) Hmisc: Harrell Miscellaneous. R package version 3.10-1.1,  
690 <http://CRAN.R-project.org/package=Hmisc>  
691  
692 Ichihashi Y, Aguilar-Martinez JA, Farhi M, Chitwood DH, Kumar R, Milon LV, Peng J,  
693 Maloof JN, Sinha NR (2014) Evolutionary developmental transcriptomics reveals a  
694 gene network module regulating interspecific diversity in plant leaf shape. *Proc Natl*  
695 *Acad Sci USA* 111(25):E2616-21.  
696  
697 Jones CS (1993) Heterochrony and heteroblastic leaf development in two subspecies  
698 of *Curbita argyrosperma* (Cucurbitaceae). *American Journal of Botany* 80(7):778-  
699 795.  
700  
701 Jones CS (1995) Does shade prolong juvenile development? A morphological  
702 analysis of leaf shape changes in *Cucurbita argyrosperma* Subsp. *Sororia*  
703 (Cucurbitaceae). *American Journal of Botany* 82(3):346-359.  
704  
705 Kerstetter RA, Poethig RS (1998) The specification of leaf identity during shoot  
706 development. *Annu. Rev Cell Dev Biol* 14:373-398.  
707  
708 Kim M, McCormick S, Timmermans M, Sinha N (2003) The expression domain of  
709 PHANTASTICA determines leaflet placement in compound leaves. *Nature* 424:438-4.  
710  
711 Kimura S, Koenig D, Kang J, Yoong FY, Sinha N (2008) Natural variation in leaf  
712 morphology results from mutation of a novel KNOX gene. *Curr Biology* 18:672-7.  
713  
714 Kuhn R, Junqua CJ, Nguyen P, Niedzielski N (2000) Rapid speaker adaptation in  
715 eigenvoice space. *Speech and Audio Processing, IEEE Transactions on* 8(6):695-707.  
716  
717 Langlade NB, Feng X, Dransfield T, Copsey L, Hanna AI, Thebaud C, Bangham A,  
718 Hudson A, Coen E (2005) Evolution through genetically controlled allometry space.  
719 *Proc Natl Acad Sci USA* 102:10221-6.  
720  
721 Miller AJ, Matasci N, Schwaninger H, Aradhya MK, Prins B, Zhong G-Y, Simon C,  
722 Buckler ES, Myles S (2013) Vitis Phylogenomics: hybridization intensities from a  
723 SNP array outperform genotype calls. *PLOS ONE* 8(11):e78680.  
724  
725 Moore M (1991) Classification and systematics of eastern North American *Vitis* L.  
726 (Vitaceae) North of Mexico. *SIDA Contrib Bot* 14:339-367.  
727  
728 Myles S, Boyko AR, Owens CL, Brown PJ, Grassi F, Aradhya MK, Prins B, Reynolds A,  
729 Chia J-M, Ware D, Bustamante CD, Buckler ES (2011) Genetic structure and  
730 domestication history of the grape. *Proc Natl Acad Sci USA* 108(9):3530-3535.

731  
732 Nicotra AB, Leigh A, Boyce CK, Jones CS, Niklas KJ, Royer DL, Tsukaya H (2011) The  
733 evolution and functional significance of leaf shape in the angiosperms. *Functional*  
734 *Plant Biology* 38:535-552.  
735  
736 Ogburn RM, Edwards EJ (2013) Repeated origin of three-dimensional leaf venation  
737 releases constraints on the evolution of succulence in plants. *Curr Biol* 23:722-726.  
738  
739 Paradis E, Claude J, Strimmer K (2004) APE: analyses of phylogenetics and evolution  
740 in R languages. *Bioinformatics* 20:289-290.  
741  
742 Park SJ, Jiang K, Schatz MC, Lippman ZB (2012) Rate of meristem maturation  
743 determines inflorescence architecture in tomato. *Proc Natl Acad Sci USA* 109(2):639-  
744 44.  
745  
746 Parkhurst DF, Loucks OL (1972) Optimal leaf size in relation to environment. *J Ecol*  
747 60:505-537.  
748  
749 Peppe DJ et al. (2011) Sensitivity of leaf size and shape to climate: global patterns  
750 and paleoclimatic applications. *New Phytol* 190:724-739.  
751  
752 Poethig RS (1990) Phase change and the regulation of shoot morphogenesis in  
753 plants. *Science* 250:923-930.  
754  
755 Poethig RS (2010) The past, present, and future of vegetative phase change. *Plant*  
756 *Physiol* 154:541-544.  
757  
758 R Core Team (2014) R: A language and environment for statistical computing.  
759 (Vienna, Austria: R Foundation for Statistical Computing).  
760  
761 Remmler L, Rolland-Lagan AG (2012) Computational method for quantifying growth  
762 patterns at the adaxial leaf surface in three dimensions. *Plant Physiol* 159(1):27-39.  
763  
764 Ren H and Wen J (2007) Vitis. *Flora of China* 12:210-222.  
765  
766 Rolland-Lagan AG, Remmler L, Girard-Bock C (2014) Quantifying shape changes and  
767 tissue deformation in leaf development. *Plant Physiol* 165(2):496-505.  
768  
769 Rubio-Somoza I, Zhou CM, Confraria A, Martinho C, von Born P, Baena-Gonzalez E,  
770 Wang JW, Weigel D (2014) Temporal control of leaf complexity by miRNA-regulated  
771 licensing of protein complexes. *Curr Biol* 24(22):2714-9.  
772  
773 Srinivasan C and Mullins MG (1981) Physiology of flowering in the grapevine—a  
774 review. *Am J Enol Vitic* 32(1):47-63.  
775  
776 Tian F, Bradbury PJ, Brown PJ, Hung H, Sun Q, Flint-Garcia S, Rocheford TR,

- McMullen MD, Holland JB, Buckler ES (2011) Genome-wide association study of leaf architecture in the maize nested association mapping population. *Nat Genet* 43:159-62.
- Venables WN, Ripley BD (2002) Modern applied statistics with S. Fourth Edition (New York: Springer).
- Wen J, Nie Z-L, Soejima A, Meng Y (2007) Phylogeny of Vitaceae based on the nuclear GAI1 gene sequences. *Canadian Journal of Botany* 85: 731 – 745.
- Wen J, Xiong Z, Nie Z-L, Mao L, Zhu Y, Kan X-Z, Ickert-Bond SM, Gerrath J, Zimmer EA, Fang X-D (2013) Transcriptome sequences resolve deep relationships of the grape family. *PLOS ONE* 8(9): e74394.
- Whorf BJ (1945) Grammatical categories. *Linguistic Soc Am* 21:1-11.
- Wickham H (2009) ggplot2: elegant graphics for data analysis. (Springer Science & Business Media).
- Wilf P, Wing SL, Greenwood DR, Greenwood CL (1998) Using fossil leaves as paleoprecipitation indicators: an Eocene example. *Geology* 26:203-206
- Wolfe JA (1971) Tertiary climate fluctuations and methods of analysis of Tertiary floras. *Palaeogeogr Palaeoclimatol Palaeoecol* 9:27-57.
- Wright IJ et al. (2004) The worldwide leaf economics spectrum. *Nature* 428:821-827.
- Wu G, Park MY, Conway SR, Wang JW, Weigel D, Poethig RS (2009) The sequential action of miR156 and miR172 regulates developmental timing in Arabidopsis. *Cell* 138(4):750-9.
- Yang L, Xu M, Koo Y, He J, Poethig RS (2013) Sugar promotes vegetative phase change in Arabidopsis thaliana by repressing the expression of MIR156A and MIR156C. *eLIFE* 2:e00260.
- Yu S, Cao L, Zhou C-M, Zhang T-Q, Lian H, Sun Y, Wu J, Huang J, Wang G, Wang J-W (2013) Sugar is an endogenous cue for juvenile-to-adult phase transition in plants. *eLIFE* 2:e00269.
- Zecca G, Abbott JR, Sun WB, Spada A, Sala F, Grassi F (2012) The timing and the mode of evolution of wild grapes (Vitis). *Mol Phylogenet Evol* 62(2):736-47.
- Zhang J, Yan Y, Lades M (1997) Face recognition: eigenface, elastic matching, and neural nets. *Proceedings of the IEEE* 85(9):1423-1435.



## Figure Legends

### Figure 1: Morphological features defining the temporal development of *Vitis*

(A) All *Vitis* leaves possess distal (yellow), proximal (orange), and petiolar (red) veins, as well as distal and proximal lobes and sinuses and a petiolar sinus. 17 homologous landmarks (black circles) were used in this study. Morphologically diverse species are shown. (B) Leaf series, scaled by the length between distal lobe tips, showing developmental stage and leaf number shape variance. (C) Unscaled *V. riparia* leaves showing changes in size at the shoot tip and base. Developmental stage (Sn) is measured starting from the shoot tip and leaf number is measured from the shoot base (Ln). Inflorescences, opposite leaves, skipping every third node, transform from clusters into tendrils from the shoot base to tip.

**Figure 2: Morphospace of leaves in the genus *Vitis*.** (A) “Eigenleaves” showing leaf morphs represented by Principal Components (PCs) at  $\pm 3$  standard deviations (s.d.) and shape variance explained by each. (B) Select species (indicated by color) representing morphological diversity in the dataset projected onto the morphospace. 95% confidence ellipses are drawn. (C and D) Locally Weighted Scatterplot Smoothing (LOWESS) showing the relationship between PCs 1-3 and (C) developmental stage and (D) leaf number. Phylogenetic relationships between species are indicated by color. (E) Developmental stage and (F) leaf number projected onto the morphospace.

**Figure 3: Shapes represented among *Vitis* species, developmental stage, and leaf number.** (A) Outlines representing the average shape of each pairwise comparison of species, indicated by magenta and green. Phylogenetic relationships are indicated. (B and C) Comparison of average shapes across (B) developmental stages and (C) leaf number for each species indicated by color.

**Figure 4: Species, developmental stage, and leaf number can be predicted independently of each other.** (A) Confusion matrix resulting from prediction of

species identity using a Linear Discriminant Analysis (LDA). The panel should be read left to right: for each species indicated on the left, leaves appeared to be derived from which apparent species (indicated on bottom)? Developmental stage and leaf number were not considered in the prediction. (B) Same as (A), except the apparent species assigned to each actual species have been converted into a proportion. Proportion totals equal one adding left to right. (C) The proportion of correctly assigned leaves for each species. (D) Similar to (A), actual developmental stage (left) and apparent developmental stage (bottom), predicted without species or leaf number information. (E) Relative developmental stage values (apparent – actual developmental stage) averaged for vines from each species. Significant deviations from 0 indicated by \* ( $p < 0.05$ ), \*\* ( $p < 0.01$ ), and \*\*\* ( $p < 0.001$ ). (F) Correlation between mean relative developmental stage of vines and first tendril node. Fitted linear model is drawn. (G-I) same as (D-F) but for leaf number. Note the significant correlation between first tendril node and relative leaf number (I) not seen for developmental stage (F). (J and K) Latent shape attributes defining developmental stage (J) and leaf number (K) indicated with average leaf shapes. (L) Comparison of changes in latent shape attributes across developmental stage (orange, outline S1; purple, arrow to S10) and leaf number (grey, outline L1; black, arrow to L10). Note non-inverse relationship between developmental stage and leaf number changes in the distal lobe tips and petiolar vein branch points (indicated).

**Figure 5: Morphospace of wild *Vitis* species and domesticated grape.** (A) “Eigenleaves” showing leaf morphs represented by PCs at  $\pm 3$  s.d. and shape variance explained by each. Lobing and petiolar sinus variation indicated. (B) Comparison of wild *Vitis* species leaf shape (red, black) with *V. vinifera* subsp. *vinifera* and *V. vinifera* subsp. *sylvestris* (green, dark green, respectively), and highly-lobed species (blue). Strong shape variation in lobing and petiolar sinus depth indicated. (C) Hierarchical clustering based on morphology. Phylogenetic groupings indicated in light gray. Groups mentioned in text indicated with Roman numerals.

**Figure 6: Evolution in developmental timing underlies leaf shape diversity in**

**domesticated grape.** (A and B) Latent shape attributes defining developmental stage (A) and leaf number (B) in domesticated grape indicated with average leaf shapes. (C) Comparison of changes in latent shape attributes across predicted developmental stage (orange, outline S1; purple, arrow to S10) and predicted leaf number (grey, outline L1; black, arrow to L10). (D and E) Predicted developmental stage (D) and predicted leaf number (E) projected onto the *V. vinifera* subsp. *vinifera* morphospace demonstrates changes in developmental timing (heterochrony) underlie leaf shape diversity in domesticated grape. (G – I) Correlation between PC1 and PC2 with predicted developmental stage (G), predicted leaf number (H), and a qualitative measure of petiolar sinus depth, PETSINMALF 2009 (I). (J) Hierarchical clustering of measured traits in grape. Morphological and predicted temporal traits (yellow), hirsuteness (green), reproductive transitions (blue), and overall leaf size (grey) indicated.

## Supplemental Data

**Figure S1: Numbers of species, vines, leaves, and shoot positions sampled.** (A) Leaves per species, arranged in descending order. (B) Vines sampled per species. For some analyses in the paper, only those *Vitis* species with  $\geq 5$  vines were analyzed (indicated by red line). (C) The average number of leaves sampled per vine for each species. (D) Number of leaves represented at each developmental stage. For some analyses, only developmental stage  $\leq S10$  were analyzed (indicated by red line). (E) Number of leaves represented at each leaf number position. For some analyses, only leaf numbers  $\leq L10$  were analyzed (indicated by red line).

**Dataset S1: Procrustes-aligned coordinates.** Wild *Vitis* species Procrustes-aligned coordinates can be found under the tab “wild\_vitis.” “id” indicates vine identification information, “species” the species, “file” the file from which the coordinate information was extracted, “image” which file in the series the image from which the leaf was extracted represents, “stage” the developmental stage of the leaf, “leaf\_number” the position in the heteroblastic series of the leaf, “total\_nodes” the

916 total number of nodes found on the shoot from which the leaf was derived, “organ”  
 917 the organ opposite the leaf at that particular node, and “x1” and “y1” through “x17”  
 918 and “y17” indicate Procrustes-aligned coordinates for each leaf. Procrustes-aligned  
 919 coordinates for *V. vinifera* subsp. *vinifera* data can be found under the tab  
 920 “vitis\_vinifera.” “id” indicates vine identification information, “genotype” the  
 921 genotype, and “x1” and “y1” through “x17” and “y17” indicate Procrustes-aligned  
 922 coordinates for each leaf.

923

924 **Dataset S2: Correlation between traits.** P values (“p\_values”), Benjamini-  
 925 Hochberg adjusted p values (“BH”), and Spearman’s rho (“rho”) provided for the  
 926 correlation between each pair of traits (“Trait1” and “Trait2”).



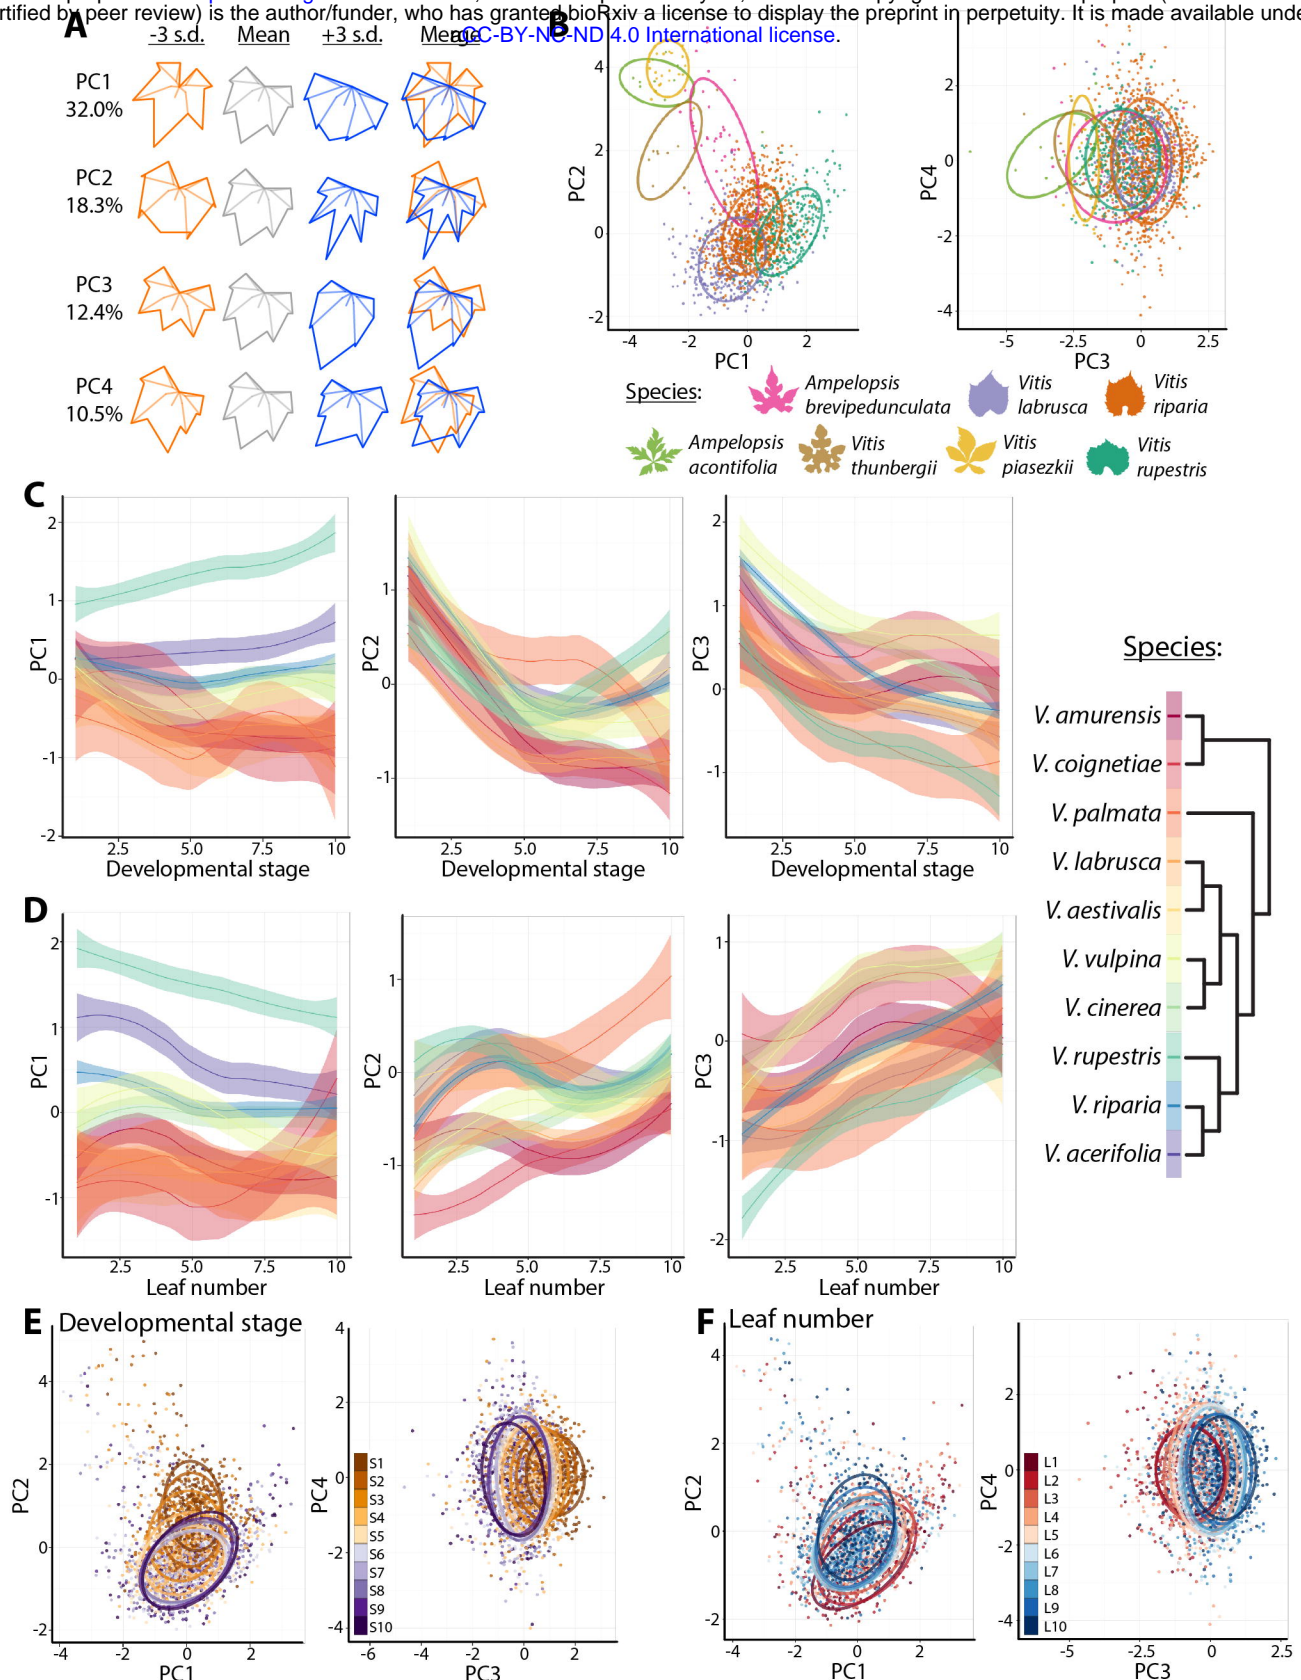

**Fig. 2: Morphospace of leaves in the genus *Vitis*.** (A) "Eigenleaves" showing leaf morphs represented by Principal Components (PCs) at  $\pm 3$  standard deviations (s.d.) and shape variance explained by each. (B) Select species (indicated by color) representing morphological diversity in the dataset projected onto the morphospace. 95% confidence ellipses are drawn. (C and D) Locally Weighted Scatterplot Smoothing (LOWESS) showing the relationship between PCs 1-3 and (C) developmental stage and (D) leaf number. Phylogenetic relationships between species are indicated by color. (E) Developmental stage and (F) leaf number projected onto the morphospace.



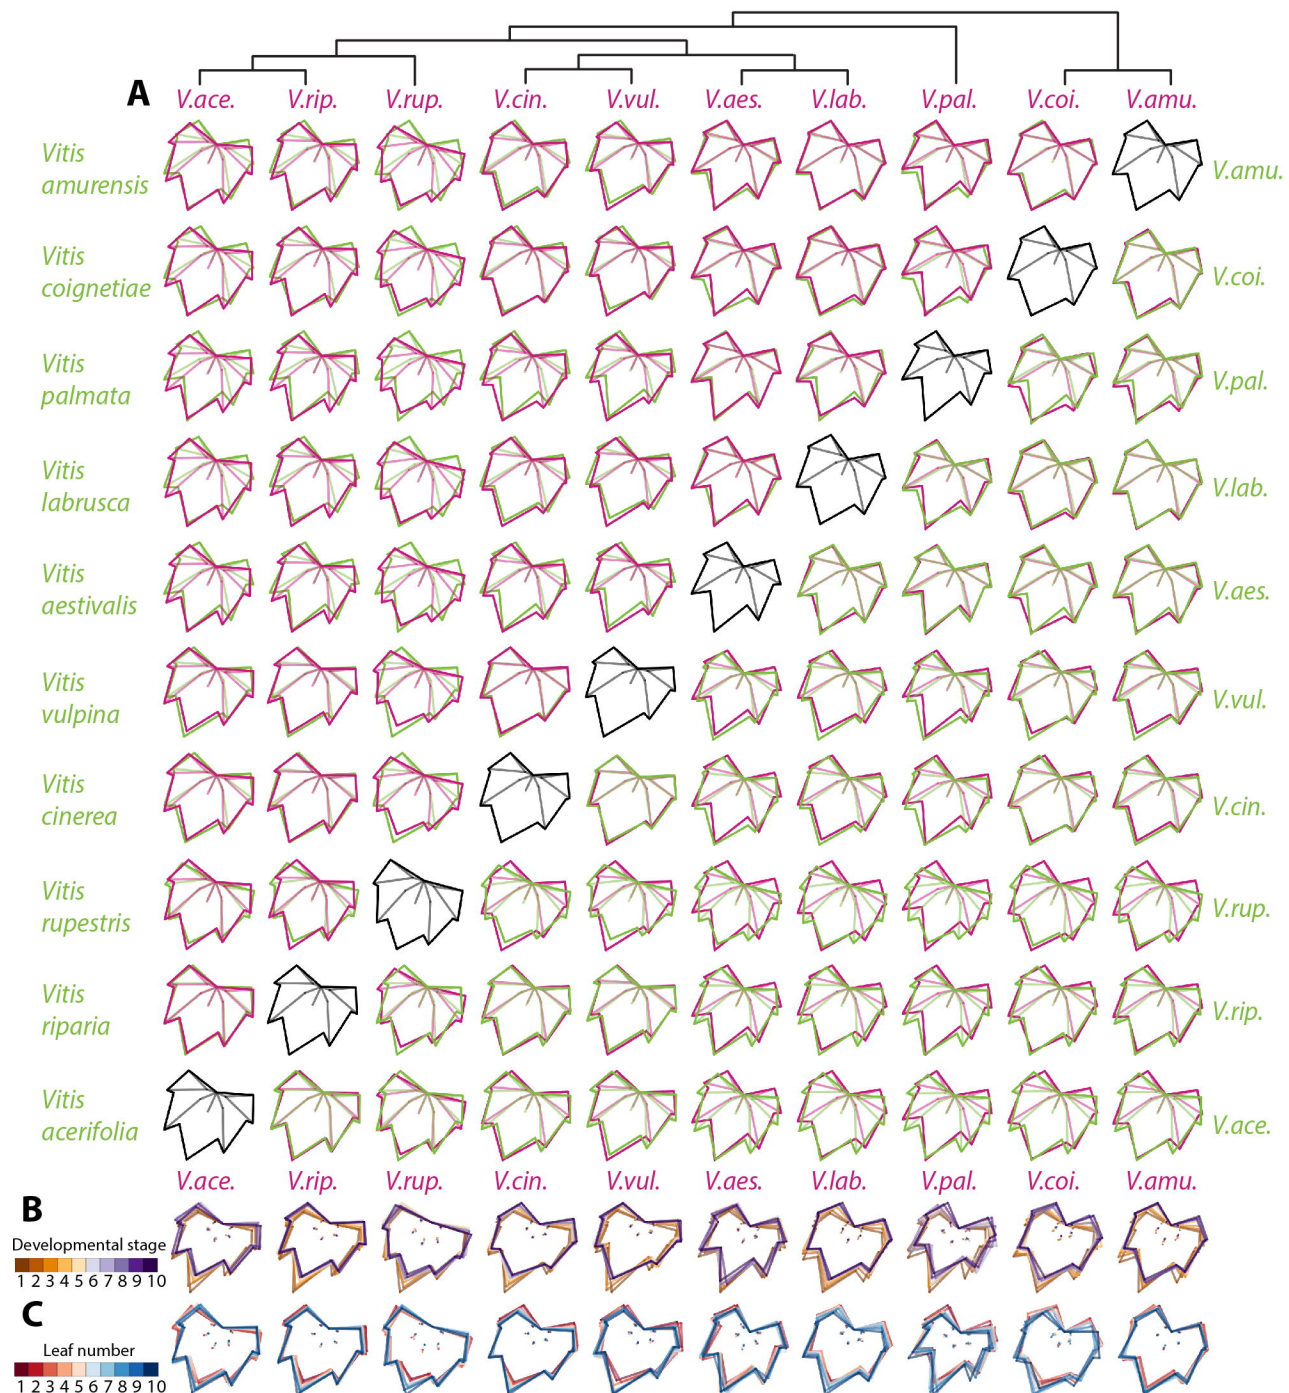

**Fig. 3: Shapes represented among *Vitis* species, developmental stage, and leaf number.**

(A) Outlines representing the average shape of each pairwise comparison of species, indicated by magenta and green. Phylogenetic relationships are indicated. (B and C) Comparison of average shapes across (B) developmental stages and (C) leaf number for each species indicated by color.

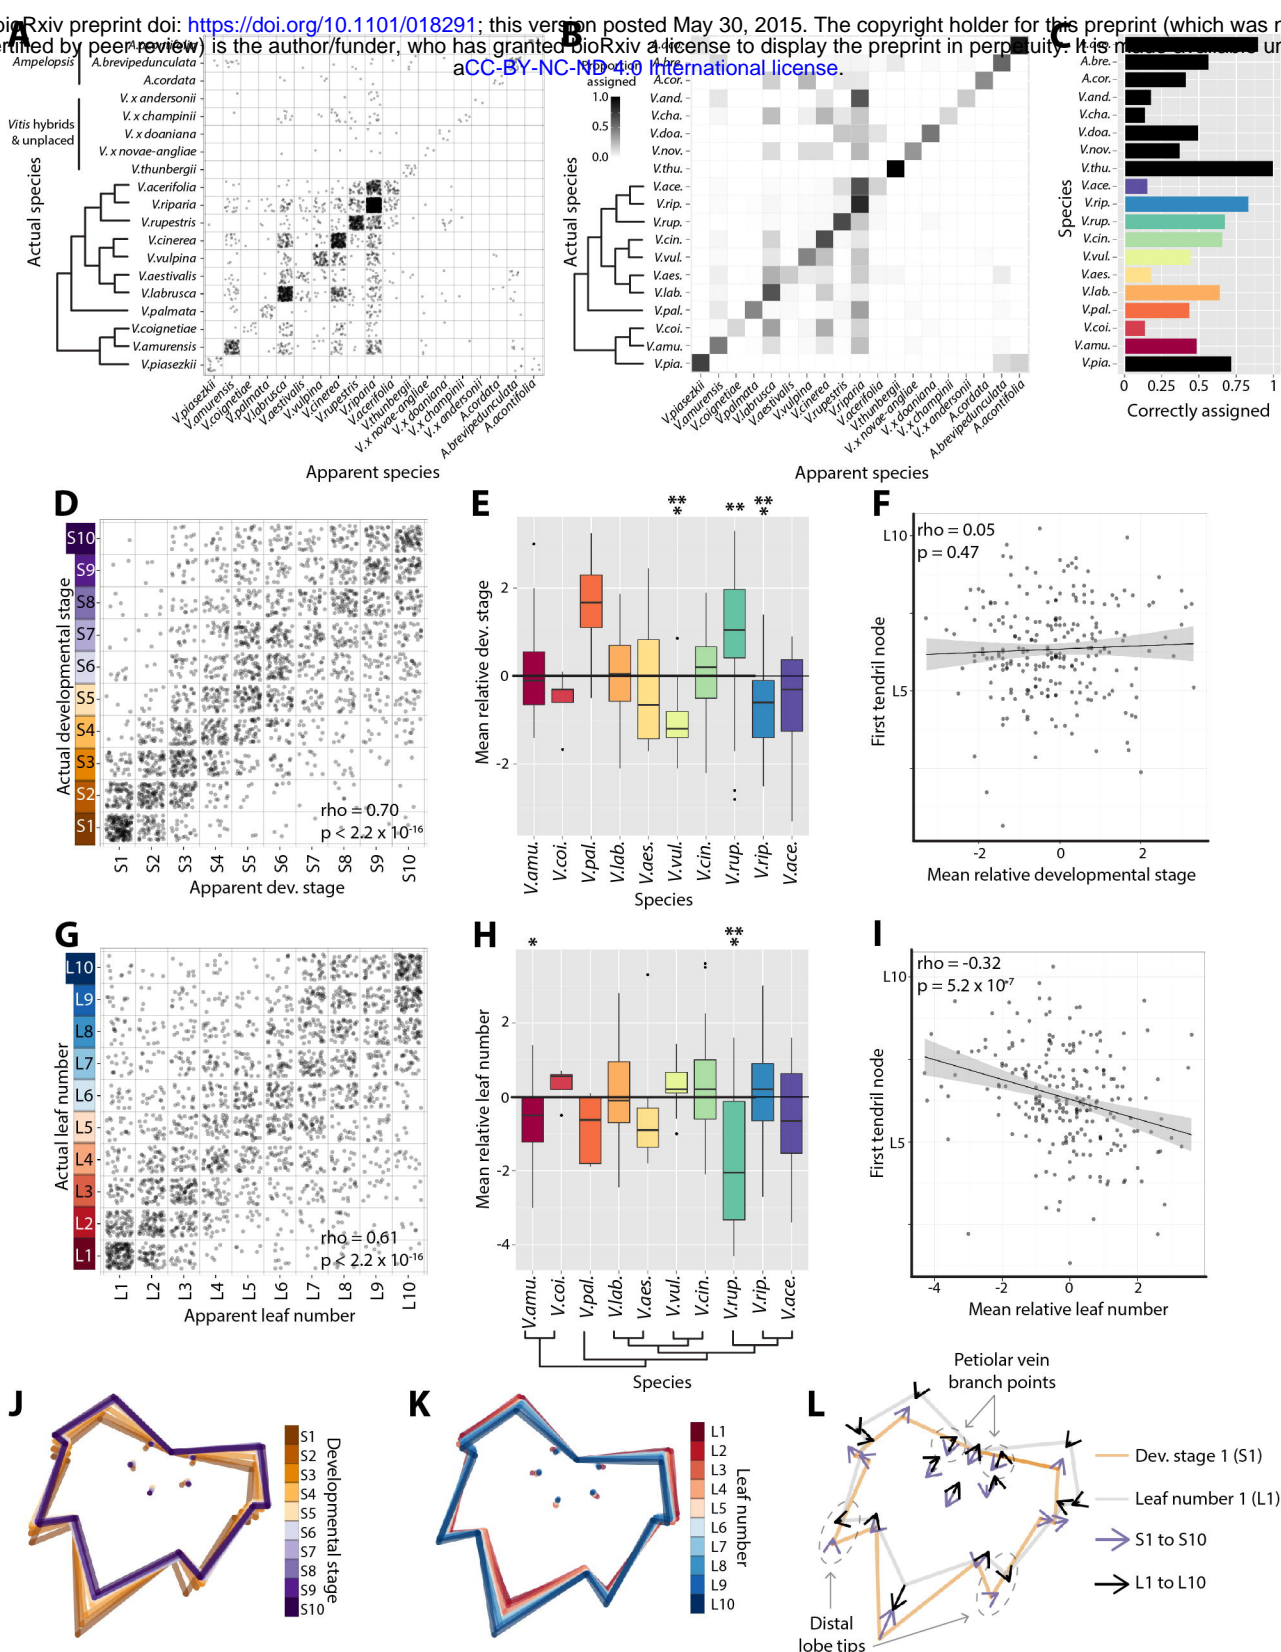

**Fig. 4: Species, developmental stage, and leaf number can be predicted independently of each other.** (A) Confusion matrix resulting from prediction of species identity using a Linear Discriminant Analysis (LDA). The panel should be read left to right: for each species indicated on the left, leaves appeared to be derived from which apparent species (indicated on bottom)? Developmental stage and leaf number were not considered in the prediction. (B) Same as (A), except the apparent species assigned to each actual species have been converted into a proportion. Proportion totals equal one adding left to right. (C) The proportion of correctly assigned leaves for each species. (D) Similar to (A), actual developmental stage (left) and apparent developmental stage (bottom), predicted without species or leaf number information. (E) Relative developmental stage values (apparent – actual developmental stage) averaged for vines from each species. Significant deviations from 0 indicated by \* ( $p < 0.05$ ), \*\* ( $p < 0.01$ ), and \*\*\* ( $p < 0.001$ ). (F) Correlation between mean relative developmental stage of vines and first tendrill node. Fitted linear model is drawn. (G-I) same as (D-F) but for leaf number. Note the significant correlation between first tendrill node and relative leaf number (I) not seen for developmental stage (F). (J and K) Latent shape attributes defining developmental stage (J) and leaf number (K) indicated with average leaf shapes. (L) Comparison of changes in latent shape attributes across developmental stage (orange, outline S1; purple, arrow to S10) and leaf number (grey, outline L1; black, arrow to L10). Note non-inverse relationship between developmental stage and leaf number changes in the distal lobe tips and petiolar vein branch points (indicated).



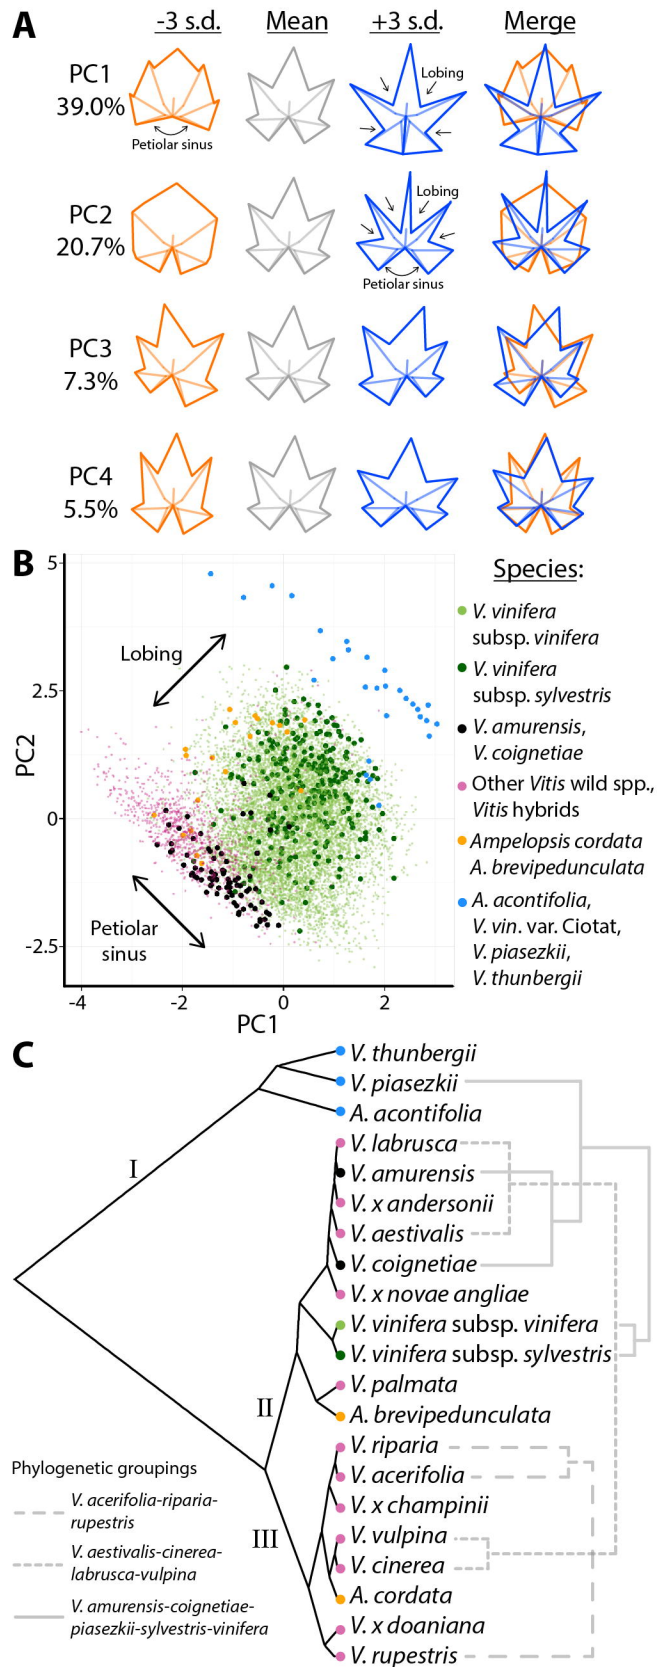

**Fig. 5: Morphospace of wild *Vitis* species and domesticated grape.** (A) “Eigenleaves” showing leaf morphs represented by PCs at  $\pm 3$  s.d. and shape variance explained by each. Lobing and petiolar sinus variation indicated. (B) Comparison of wild *Vitis* species leaf shape (red, black) with *V. vinifera* subsp. *vinifera* and *V. vinifera* subsp. *sylvestris* (green, dark green, respectively), and highly-lobed species (blue). Strong shape variation in lobing and petiolar sinus depth indicated. (C) Hierarchical clustering based on morphology. Phylogenetic groupings indicated in light gray. Groups mentioned in text indicated with Roman numerals.

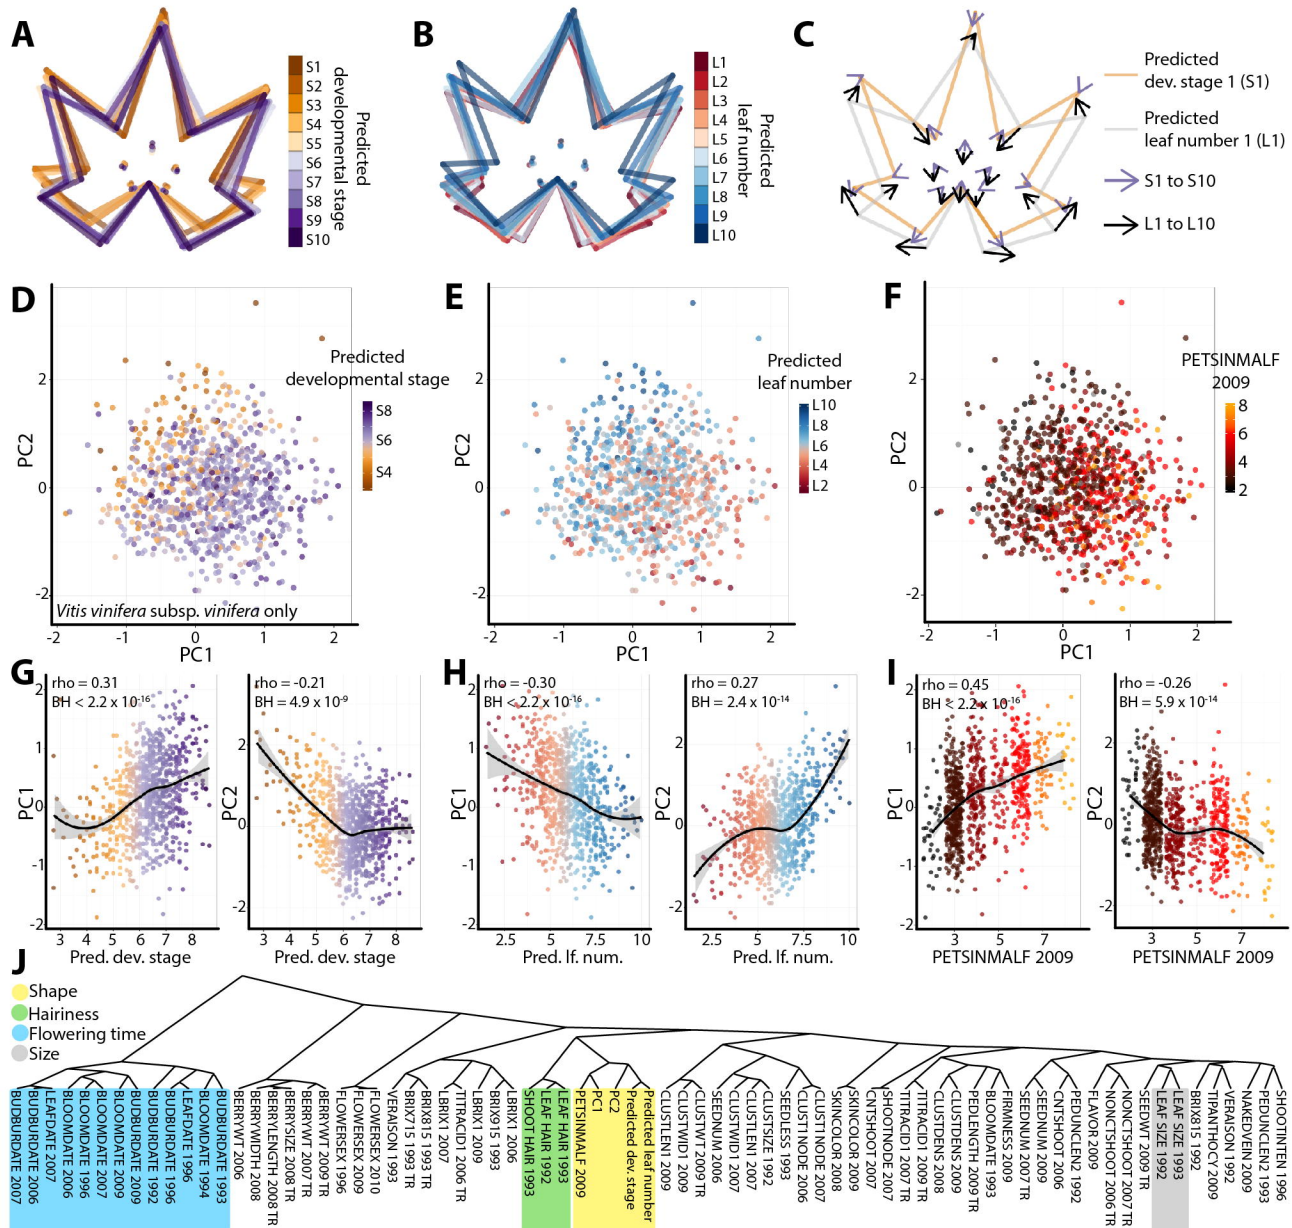

**Fig. 6: Evolution in developmental timing underlies leaf shape diversity in domesticated grape.** (A and B) Latent shape attributes defining developmental stage (A) and leaf number (B) in domesticated grape indicated with average leaf shapes. (C) Comparison of changes in latent shape attributes across predicted developmental stage (orange, outline S1; purple, arrow to S10) and predicted leaf number (grey, outline L1; black, arrow to L10). (D and E) Predicted developmental stage (D) and predicted leaf number (E) projected onto the *V. vinifera* subsp. *vinifera* morphospace demonstrates changes in developmental timing (heterochrony) underlie leaf shape diversity in domesticated grape. (G – I) Correlation between PC1 and PC2 with predicted developmental stage (G), predicted leaf number (H), and a qualitative measure of petiolar sinus depth, PETSINMALF 2009 (I). (J) Hierarchical clustering of measured traits in grape. Morphological and predicted temporal traits (yellow), hirsuteness (green), reproductive transitions (blue), and overall leaf size (grey) indicated.
